# Supplementary material for: Genome-Wide Analysis of MYB Transcription Factors and Screening of MYBs Involved in the Red Color Formation in Rhododendron delavayi
Source: MDPI journal article supplement (doi:10.3390/ijms24054641), 2023-02-28
Supplement: s1 [file s1]

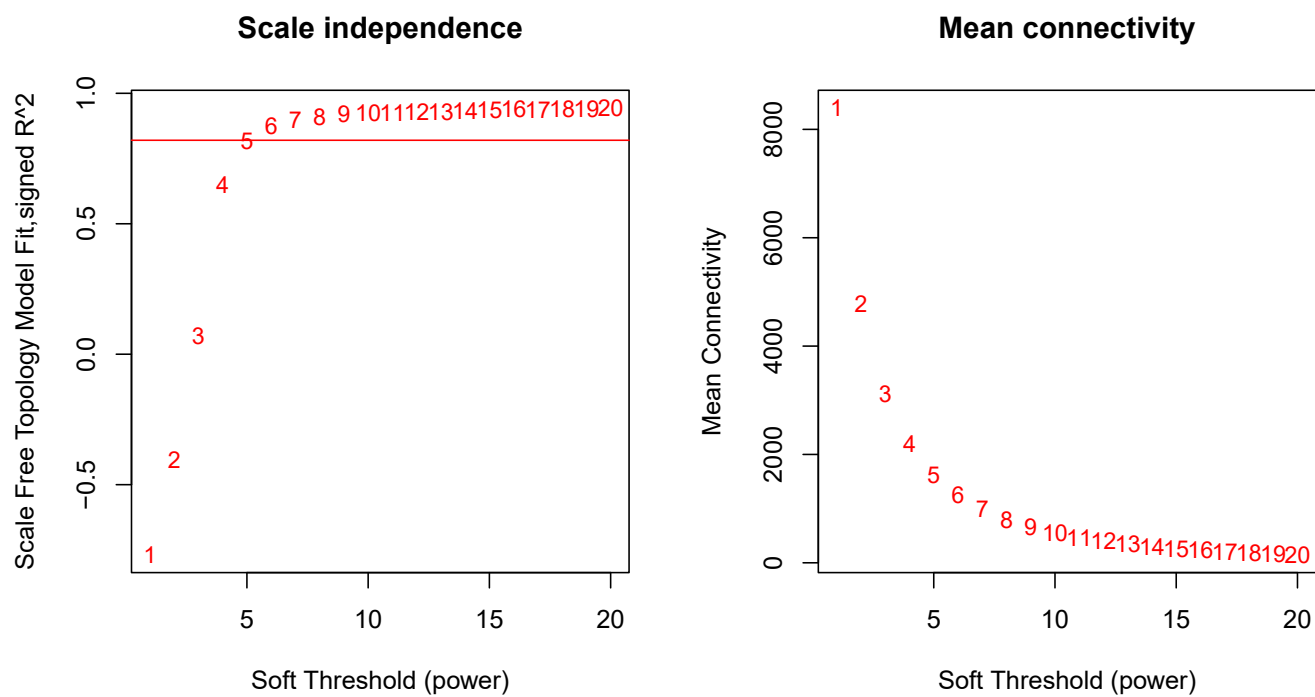

Figure S2 Soft threshold ( $\beta$  value) determination that makes the network close to scale-free; the red dotted line is drawn at 5.
