# Supplementary figures and images for: Genome-Wide Analysis of MYB Transcription Factors and Screening of MYBs Involved in the Red Color Formation in Rhododendron delavayi
Source: MDPI journal article supplement (doi:10.3390/ijms24054641), 2023-02-28

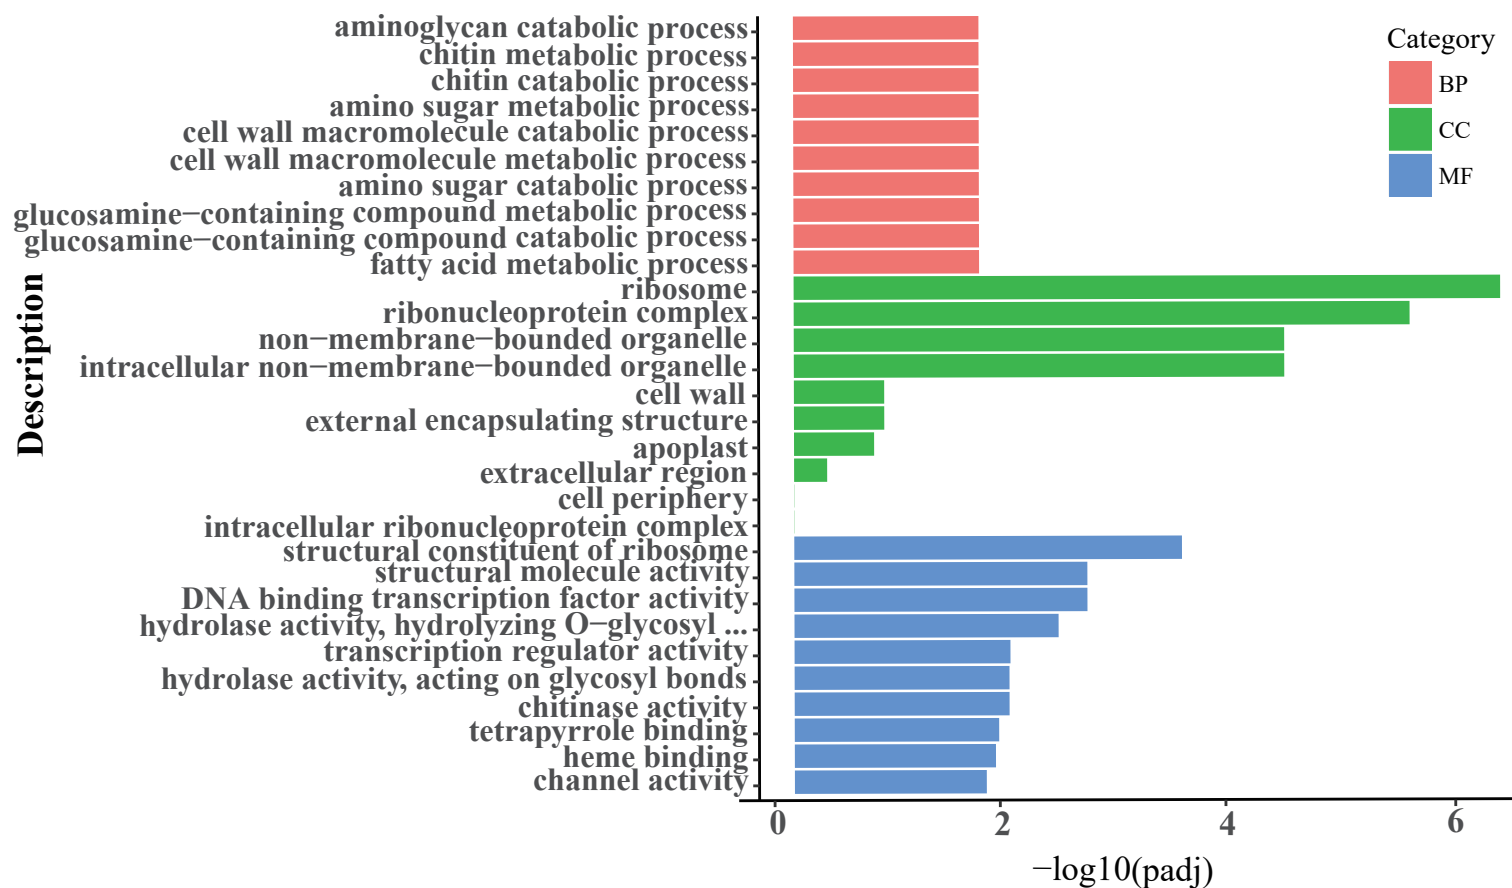

Figure S1. GO enrichment analysis of MY-1 vs MY-2 DEGs. MY-1, spotted petals; MY-2, unspotted petals;

Supplement: s1 [file s1]
